# Supplementary material for: Hidden Glutathione Transferases in the Human Genome
Source: MDPI journal article supplement (doi:10.3390/biom13081240), 2023-08-12
Supplement: s1 [file s1]

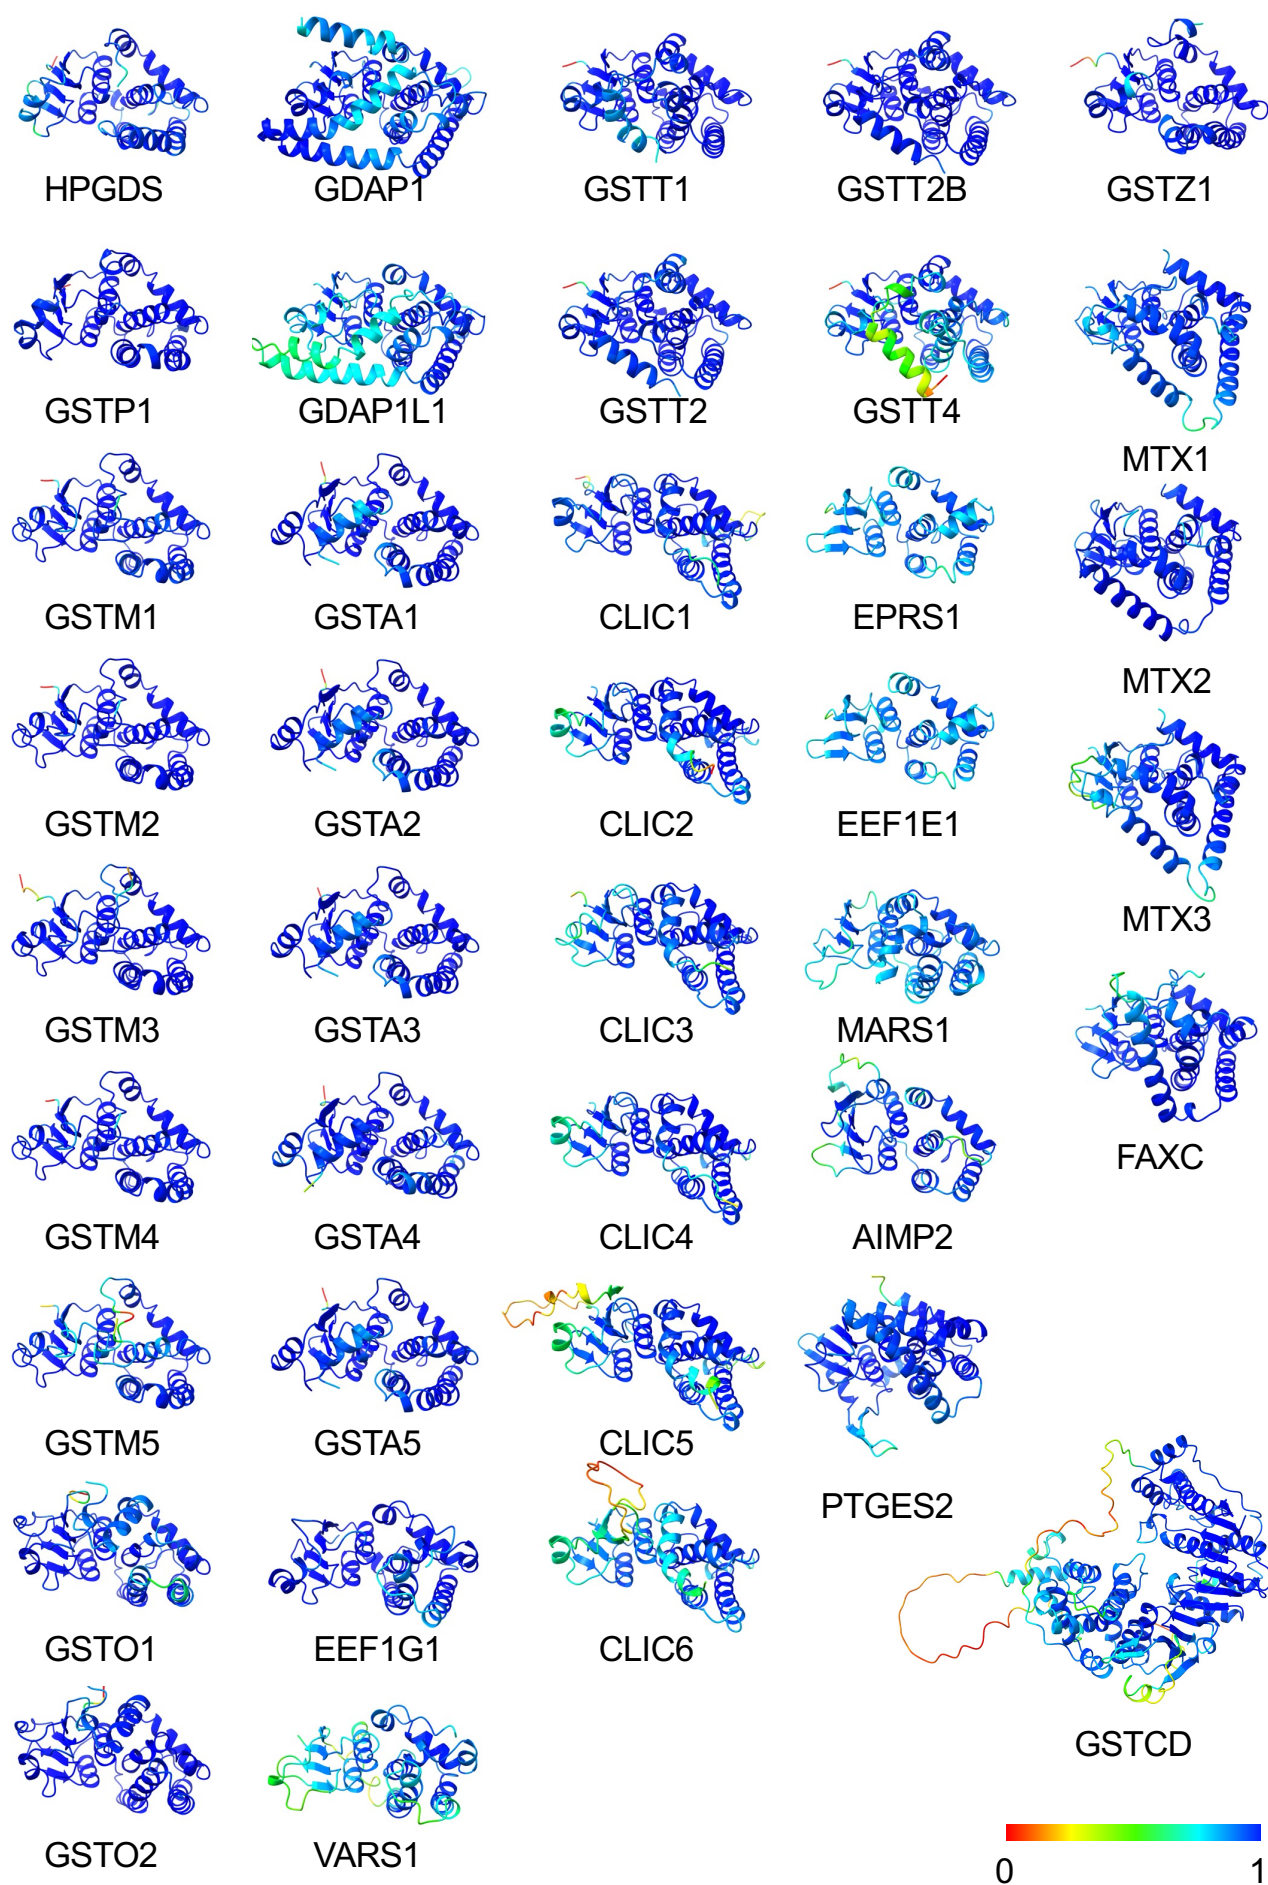

**Figure S1.** AlphaFold predictions of GST domain-containing proteins in the human genome shown in Cartoon form. Structures are colored by pLDDT (key at bottom right). Only the GST-domains are shown, except for GSTCD where the whole protein is shown.
