# Supplementary material for: Hidden Glutathione Transferases in the Human Genome
Source: Biomolecules. 2023 Aug 12;13(8):1240. doi: 10.3390/biom13081240 (PMC10452860; doi:10.3390/biom13081240)
Supplement: Supplementary file 1 [file biomolecules-13-01240-s001.zip › Table_S1.xlsx]

## Sheet: Sheet1
Table S1. Model confidence, ipTM and pTM scores for pairwise predictions of cGST domain-containing proteins. Where experimental structure data are available, pairs are highlighted in red.
Model confidence			"=0.8 x ipTM + 0.2 x pTM"
	HPGDS	GSTP1	GSTM1	GSTM2	GSTM3	GSTM4	GSTM5	GSTA1	GSTA2	GSTA3	GSTA4	GSTA5	GSTZ1	GSTO1	GSTO2	CLIC1	CLIC2	CLIC3	CLIC4	CLIC5	CLIC6	GDAP1	GDAP1L1	GSTT1	GSTT2	GSTT2B	GSTT4	AIMP2	EPRS1	EEF1E1	MARS1	PTGES2	FAXC	MTX1	MTX2	MTX3	GSTCD	EEF1G	VARS1
VARS1	0.82	0.894	0.276	0.274	0.256	0.266	0.256	0.884	0.884	0.902	0.854	0.892	0.89	0.574	0.718	0.276	0.662	0.186	0.276	0.238	0.224	0.316	0.252	0.902	0.912	0.902	0.85	0.322	0.2	0.772	0.9	0.262	0.234	0.224	0.296	0.354	0.304	0.912	0.848
EEF1G	0.888	0.924	0.37	0.434	0.354	0.734	0.318	0.924	0.914	0.914	0.896	0.914	0.914	0.368	0.404	0.292	0.196	0.238	0.328	0.266	0.196	0.28	0.222	0.932	0.924	0.924	0.93	0.282	0.806	0.84	0.876	0.696	0.294	0.25	0.206	0.24	0.33	0.932	0.912
GSTCD	0.222	0.244	0.206	0.218	0.208	0.248	0.222	0.188	0.196	0.188	0.2	0.204	0.192	0.214	0.23	0.346	0.312	0.366	0.268	0.294	0.43	0.236	0.246	0.198	0.204	0.202	0.232	0.368	0.294	0.318	0.848	0.254	0.202	0.24	0.21	0.23	0.238	0.42	0.252
MTX3	0.26	0.246	0.254	0.244	0.254	0.262	0.254	0.236	0.236	0.228	0.334	0.246	0.186	0.32	0.284	0.272	0.534	0.192	0.228	0.254	0.244	0.34	0.204	0.238	0.256	0.264	0.3	0.26	0.222	0.464	0.598	0.204	0.192	0.622	0.922	0.83	0.258	0.23	0.336
MTX2	0.226	0.318	0.308	0.298	0.256	0.28	0.256	0.228	0.212	0.222	0.276	0.356	0.328	0.256	0.23	0.218	0.192	0.2	0.174	0.176	0.27	0.314	0.202	0.594	0.256	0.256	0.608	0.232	0.31	0.232	0.86	0.276	0.904	0.92	0.282	0.922	0.232	0.206	0.258
MTX1	0.234	0.266	0.254	0.236	0.234	0.226	0.234	0.24	0.23	0.258	0.32	0.24	0.196	0.274	0.362	0.19	0.424	0.2	0.202	0.21	0.244	0.212	0.238	0.218	0.266	0.258	0.22	0.366	0.234	0.472	0.412	0.196	0.21	0.794	0.92	0.576	0.266	0.25	0.224
FAXC	0.216	0.248	0.246	0.266	0.22	0.244	0.292	0.196	0.212	0.222	0.486	0.284	0.248	0.274	0.238	0.218	0.406	0.724	0.246	0.22	0.298	0.258	0.742	0.408	0.23	0.22	0.296	0.302	0.23	0.228	0.28	0.242	0.942	0.22	0.904	0.192	0.206	0.268	0.234
PTGES2	0.214	0.228	0.238	0.222	0.242	0.26	0.226	0.244	0.232	0.236	0.302	0.234	0.22	0.216	0.206	0.494	0.272	0.234	0.522	0.25	0.226	0.474	0.246	0.542	0.244	0.312	0.332	0.342	0.62	0.824	0.644	0.76	0.242	0.178	0.238	0.204	0.246	0.698	0.262
MARS1	0.876	0.914	0.714	0.75	0.876	0.83	0.832	0.848	0.822	0.84	0.472	0.886	0.472	0.288	0.716	0.904	0.616	0.418	0.688	0.432	0.422	0.306	0.304	0.924	0.914	0.912	0.922	0.588	0.618	0.93	0.922	0.396	0.608	0.696	0.868	0.636	0.382	0.878	0.874
EEF1E1	0.216	0.822	0.284	0.292	0.282	0.264	0.236	0.58	0.28	0.828	0.626	0.564	0.256	0.336	0.742	0.266	0.266	0.864	0.232	0.37	0.24	0.288	0.266	0.858	0.912	0.912	0.858	0.846	0.884	0.892	0.93	0.826	0.23	0.524	0.216	0.308	0.286	0.858	0.788
EPRS1	0.896	0.914	0.258	0.602	0.914	0.364	0.886	0.876	0.892	0.874	0.752	0.874	0.23	0.27	0.244	0.744	0.408	0.344	0.834	0.85	0.356	0.882	0.232	0.914	0.394	0.394	0.284	0.93	0.878	0.892	0.646	0.656	0.222	0.224	0.206	0.204	0.37	0.21	0.684
AIMP2	0.444	0.878	0.242	0.224	0.216	0.232	0.21	0.232	0.286	0.284	0.266	0.248	0.244	0.246	0.218	0.828	0.702	0.784	0.84	0.802	0.754	0.482	0.22	0.878	0.404	0.298	0.76	0.866	0.93	0.856	0.498	0.432	0.334	0.314	0.25	0.216	0.282	0.264	0.458
GSTT4	0.886	0.912	0.274	0.274	0.282	0.308	0.318	0.868	0.868	0.868	0.508	0.85	0.93	0.318	0.292	0.216	0.36	0.224	0.316	0.242	0.198	0.288	0.208	0.942	0.932	0.932	0.932	0.492	0.32	0.858	0.914	0.306	0.34	0.216	0.724	0.244	0.21	0.93	0.858
GSTT2B	0.868	0.914	0.22	0.216	0.214	0.216	0.224	0.922	0.922	0.914	0.78	0.922	0.932	0.49	0.49	0.22	0.628	0.186	0.212	0.186	0.2	0.196	0.202	0.94	0.942	0.932	0.932	0.254	0.34	0.92	0.922	0.244	0.22	0.274	0.248	0.256	0.194	0.924	0.912
GSTT2	0.85	0.914	0.212	0.232	0.224	0.25	0.242	0.914	0.922	0.914	0.78	0.922	0.932	0.48	0.4	0.228	0.584	0.194	0.212	0.194	0.2	0.196	0.21	0.94	0.932	0.942	0.932	0.36	0.358	0.92	0.914	0.264	0.21	0.258	0.23	0.274	0.202	0.924	0.912
GSTT1	0.884	0.932	0.904	0.714	0.86	0.294	0.914	0.904	0.904	0.894	0.744	0.896	0.932	0.374	0.292	0.21	0.212	0.256	0.212	0.238	0.208	0.26	0.226	0.952	0.94	0.94	0.942	0.852	0.878	0.868	0.924	0.22	0.738	0.238	0.578	0.236	0.204	0.932	0.92
GDAP1L1	0.19	0.24	0.246	0.236	0.244	0.25	0.236	0.302	0.266	0.24	0.232	0.276	0.27	0.234	0.236	0.194	0.254	0.22	0.23	0.23	0.218	0.262	0.512	0.26	0.218	0.208	0.218	0.252	0.232	0.258	0.25	0.606	0.35	0.22	0.212	0.194	0.264	0.244	0.332
GDAP1	0.212	0.316	0.232	0.25	0.314	0.276	0.234	0.218	0.208	0.226	0.234	0.244	0.226	0.254	0.228	0.312	0.376	0.338	0.41	0.636	0.284	0.314	0.262	0.242	0.204	0.204	0.33	0.31	0.244	0.234	0.278	0.466	0.24	0.25	0.268	0.266	0.242	0.296	0.272
CLIC6	0.192	0.464	0.262	0.326	0.298	0.316	0.338	0.224	0.214	0.206	0.232	0.242	0.278	0.408	0.236	0.188	0.198	0.286	0.214	0.194	0.26	0.266	0.192	0.2	0.276	0.2	0.198	0.806	0.336	0.244	0.594	0.364	0.29	0.226	0.242	0.244	0.47	0.196	0.216
CLIC5	0.188	0.422	0.29	0.306	0.292	0.274	0.284	0.226	0.236	0.2	0.218	0.216	0.598	0.256	0.24	0.226	0.246	0.254	0.254	0.28	0.196	0.276	0.22	0.202	0.186	0.186	0.216	0.866	0.41	0.22	0.516	0.364	0.228	0.202	0.174	0.272	0.312	0.202	0.24
CLIC4	0.266	0.638	0.428	0.354	0.31	0.34	0.32	0.228	0.222	0.204	0.212	0.228	0.57	0.328	0.3	0.236	0.246	0.226	0.264	0.264	0.198	0.26	0.212	0.184	0.222	0.23	0.29	0.848	0.3	0.452	0.574	0.622	0.22	0.22	0.184	0.244	0.374	0.354	0.268
CLIC3	0.232	0.244	0.254	0.28	0.432	0.306	0.27	0.218	0.226	0.208	0.208	0.226	0.36	0.282	0.24	0.244	0.27	0.31	0.242	0.236	0.276	0.338	0.23	0.57	0.196	0.186	0.198	0.774	0.346	0.742	0.3	0.234	0.506	0.198	0.228	0.182	0.436	0.28	0.184
CLIC2	0.252	0.522	0.29	0.288	0.272	0.274	0.282	0.246	0.256	0.22	0.23	0.228	0.222	0.256	0.23	0.254	0.29	0.264	0.246	0.254	0.214	0.32	0.246	0.246	0.628	0.61	0.244	0.766	0.48	0.248	0.77	0.264	0.4	0.29	0.2	0.586	0.33	0.23	0.492
CLIC1	0.242	0.338	0.344	0.358	0.302	0.348	0.454	0.21	0.226	0.192	0.218	0.202	0.344	0.494	0.362	0.336	0.272	0.236	0.326	0.238	0.178	0.312	0.22	0.184	0.23	0.23	0.208	0.784	0.656	0.232	0.706	0.478	0.3	0.2	0.246	0.252	0.34	0.274	0.276
GSTO2	0.778	0.714	0.79	0.592	0.778	0.762	0.78	0.894	0.896	0.886	0.886	0.886	0.876	0.932	0.922	0.354	0.236	0.256	0.3	0.23	0.244	0.222	0.236	0.372	0.426	0.408	0.31	0.236	0.27	0.804	0.736	0.206	0.248	0.298	0.24	0.622	0.226	0.286	0.458
GSTO1	0.582	0.244	0.25	0.268	0.804	0.26	0.644	0.886	0.894	0.886	0.894	0.886	0.894	0.93	0.932	0.44	0.266	0.292	0.326	0.264	0.374	0.246	0.234	0.48	0.472	0.48	0.372	0.236	0.27	0.468	0.28	0.206	0.23	0.274	0.256	0.338	0.21	0.456	0.52
GSTZ1	0.17	0.868	0.204	0.22	0.194	0.202	0.21	0.732	0.76	0.768	0.732	0.714	0.94	0.894	0.878	0.49	0.804	0.36	0.4	0.4	0.29	0.226	0.374	0.932	0.932	0.932	0.932	0.208	0.23	0.306	0.39	0.22	0.266	0.196	0.286	0.178	0.192	0.912	0.902
GSTA5	0.922	0.932	0.914	0.924	0.922	0.914	0.914	0.942	0.942	0.942	0.932	0.922	0.732	0.894	0.886	0.218	0.228	0.208	0.236	0.218	0.232	0.242	0.23	0.902	0.922	0.922	0.86	0.222	0.644	0.774	0.868	0.224	0.302	0.248	0.284	0.246	0.198	0.906	0.892
GSTA4	0.912	0.932	0.912	0.906	0.912	0.904	0.904	0.94	0.942	0.94	0.924	0.932	0.668	0.894	0.886	0.192	0.23	0.216	0.212	0.218	0.224	0.226	0.23	0.678	0.778	0.78	0.526	0.312	0.78	0.794	0.382	0.278	0.23	0.302	0.354	0.432	0.206	0.888	0.864
GSTA3	0.922	0.932	0.914	0.914	0.914	0.912	0.912	0.942	0.942	0.932	0.94	0.942	0.75	0.886	0.886	0.202	0.212	0.208	0.202	0.2	0.216	0.226	0.222	0.886	0.912	0.912	0.876	0.256	0.874	0.8	0.85	0.236	0.204	0.23	0.222	0.238	0.198	0.914	0.894
GSTA2	0.914	0.94	0.914	0.924	0.922	0.922	0.914	0.942	0.932	0.942	0.94	0.942	0.796	0.896	0.894	0.218	0.354	0.306	0.228	0.226	0.224	0.208	0.222	0.894	0.914	0.922	0.868	0.276	0.884	0.38	0.794	0.244	0.204	0.222	0.212	0.228	0.19	0.914	0.884
GSTA1	0.912	0.94	0.922	0.924	0.922	0.922	0.914	0.94	0.942	0.942	0.94	0.942	0.732	0.894	0.894	0.218	0.282	0.226	0.228	0.208	0.232	0.218	0.266	0.904	0.922	0.922	0.876	0.274	0.858	0.45	0.822	0.226	0.204	0.23	0.222	0.236	0.198	0.924	0.882
GSTM5	0.922	0.922	0.95	0.95	0.942	0.95	0.922	0.914	0.922	0.912	0.912	0.922	0.202	0.26	0.754	0.41	0.274	0.27	0.356	0.3	0.316	0.236	0.23	0.906	0.216	0.224	0.408	0.22	0.878	0.244	0.786	0.226	0.294	0.228	0.272	0.262	0.208	0.312	0.266
GSTM4	0.914	0.924	0.952	0.952	0.95	0.942	0.95	0.922	0.922	0.912	0.904	0.922	0.202	0.438	0.788	0.32	0.254	0.306	0.338	0.282	0.308	0.26	0.24	0.304	0.242	0.242	0.264	0.234	0.258	0.326	0.848	0.236	0.246	0.236	0.282	0.254	0.208	0.73	0.266
GSTM3	0.922	0.932	0.95	0.95	0.932	0.95	0.942	0.922	0.922	0.914	0.914	0.922	0.204	0.25	0.762	0.342	0.272	0.422	0.328	0.298	0.296	0.284	0.238	0.878	0.232	0.206	0.28	0.206	0.912	0.256	0.876	0.252	0.22	0.226	0.256	0.244	0.216	0.304	0.276
GSTM2	0.922	0.914	0.952	0.942	0.95	0.952	0.95	0.924	0.924	0.914	0.914	0.924	0.212	0.26	0.34	0.384	0.288	0.278	0.384	0.294	0.344	0.244	0.248	0.842	0.234	0.226	0.31	0.232	0.506	0.284	0.75	0.224	0.256	0.236	0.308	0.244	0.216	0.274	0.266
GSTM1	0.914	0.924	0.942	0.952	0.95	0.952	0.95	0.914	0.922	0.914	0.912	0.914	0.212	0.528	0.798	0.33	0.298	0.262	0.356	0.29	0.26	0.224	0.408	0.896	0.212	0.212	0.444	0.25	0.266	0.256	0.354	0.228	0.256	0.244	0.308	0.262	0.2	0.324	0.266
GSTP1	0.932	0.942	0.924	0.914	0.932	0.914	0.924	0.94	0.94	0.932	0.932	0.932	0.876	0.386	0.616	0.382	0.54	0.246	0.676	0.354	0.506	0.296	0.224	0.932	0.914	0.914	0.912	0.86	0.906	0.866	0.914	0.24	0.248	0.274	0.31	0.254	0.218	0.924	0.884
HPGDS	0.942	0.932	0.922	0.922	0.922	0.914	0.922	0.912	0.914	0.914	0.904	0.914	0.178	0.396	0.69	0.234	0.242	0.18	0.222	0.214	0.2	0.194	0.2	0.868	0.888	0.904	0.878	0.734	0.896	0.198	0.876	0.226	0.218	0.236	0.234	0.284	0.238	0.898	0.804
ipTM
	HPGDS	GSTP1	GSTM1	GSTM2	GSTM3	GSTM4	GSTM5	GSTA1	GSTA2	GSTA3	GSTA4	GSTA5	GSTZ1	GSTO1	GSTO2	CLIC1	CLIC2	CLIC3	CLIC4	CLIC5	CLIC6	GDAP1	GDAP1L1	GSTT1	GSTT2	GSTT2B	GSTT4	AIMP2	EPRS1	EEF1E1	MARS1	PTGES2	FAXC	MTX1	MTX2	MTX3	GSTCD	EEF1G	VARS1
VARS1	0.81	0.89	0.2	0.2	0.18	0.19	0.18	0.88	0.88	0.9	0.85	0.89	0.89	0.53	0.69	0.2	0.63	0.1	0.2	0.16	0.15	0.24	0.17	0.9	0.91	0.9	0.84	0.26	0.13	0.76	0.9	0.19	0.15	0.14	0.22	0.29	0.23	0.91	0.84
EEF1G	0.88	0.92	0.31	0.39	0.3	0.73	0.25	0.92	0.91	0.91	0.89	0.91	0.91	0.3	0.34	0.22	0.11	0.16	0.26	0.19	0.12	0.2	0.14	0.93	0.92	0.92	0.93	0.21	0.79	0.83	0.87	0.68	0.22	0.17	0.12	0.16	0.26	0.93	0.91
GSTCD	0.13	0.16	0.12	0.13	0.12	0.17	0.14	0.1	0.11	0.1	0.11	0.12	0.1	0.13	0.15	0.28	0.24	0.3	0.19	0.22	0.38	0.16	0.17	0.11	0.12	0.12	0.15	0.3	0.21	0.24	0.85	0.18	0.12	0.16	0.13	0.15	0.17	0.36	0.17
MTX3	0.18	0.17	0.18	0.17	0.18	0.19	0.18	0.16	0.16	0.15	0.27	0.17	0.1	0.25	0.21	0.2	0.49	0.11	0.15	0.18	0.17	0.27	0.12	0.16	0.18	0.19	0.23	0.18	0.13	0.41	0.56	0.13	0.11	0.59	0.92	0.82	0.18	0.15	0.27
MTX2	0.14	0.25	0.24	0.23	0.18	0.21	0.18	0.15	0.13	0.14	0.2	0.29	0.26	0.18	0.15	0.14	0.11	0.12	0.09	0.09	0.2	0.24	0.12	0.56	0.18	0.18	0.57	0.15	0.23	0.14	0.85	0.21	0.9	0.92	0.21	0.92	0.15	0.12	0.18
MTX1	0.15	0.19	0.18	0.16	0.16	0.15	0.16	0.16	0.15	0.18	0.25	0.16	0.11	0.2	0.3	0.11	0.37	0.12	0.12	0.13	0.17	0.13	0.16	0.14	0.19	0.18	0.14	0.3	0.14	0.42	0.35	0.12	0.13	0.78	0.92	0.54	0.19	0.17	0.14
FAXC	0.13	0.17	0.17	0.19	0.14	0.17	0.22	0.11	0.13	0.14	0.44	0.21	0.17	0.2	0.16	0.14	0.35	0.7	0.17	0.14	0.23	0.18	0.73	0.35	0.15	0.14	0.23	0.23	0.14	0.14	0.21	0.17	0.94	0.14	0.9	0.11	0.12	0.19	0.15
PTGES2	0.12	0.15	0.17	0.15	0.17	0.19	0.15	0.16	0.15	0.15	0.23	0.16	0.13	0.14	0.13	0.45	0.2	0.16	0.48	0.17	0.15	0.43	0.17	0.51	0.17	0.25	0.27	0.28	0.58	0.81	0.61	0.74	0.17	0.09	0.16	0.13	0.17	0.68	0.19
MARS1	0.87	0.91	0.69	0.73	0.87	0.82	0.82	0.84	0.81	0.83	0.42	0.88	0.42	0.21	0.69	0.9	0.58	0.36	0.66	0.38	0.37	0.23	0.23	0.92	0.91	0.91	0.92	0.55	0.58	0.93	0.92	0.34	0.57	0.67	0.86	0.6	0.32	0.87	0.87
EEF1E1	0.13	0.81	0.2	0.21	0.2	0.18	0.15	0.54	0.2	0.82	0.59	0.52	0.17	0.26	0.72	0.18	0.18	0.86	0.14	0.31	0.16	0.2	0.18	0.85	0.91	0.91	0.85	0.84	0.88	0.89	0.93	0.82	0.14	0.47	0.12	0.23	0.2	0.85	0.78
EPRS1	0.89	0.91	0.17	0.56	0.91	0.29	0.88	0.87	0.89	0.87	0.73	0.87	0.14	0.18	0.15	0.72	0.34	0.27	0.82	0.84	0.29	0.88	0.14	0.91	0.32	0.32	0.2	0.93	0.87	0.89	0.61	0.62	0.13	0.13	0.11	0.11	0.3	0.12	0.66
AIMP2	0.39	0.87	0.16	0.14	0.13	0.15	0.13	0.15	0.21	0.21	0.19	0.17	0.17	0.16	0.13	0.82	0.68	0.77	0.83	0.79	0.75	0.43	0.13	0.87	0.34	0.22	0.74	0.86	0.93	0.85	0.45	0.38	0.26	0.24	0.17	0.13	0.2	0.19	0.41
GSTT4	0.88	0.91	0.2	0.2	0.21	0.24	0.25	0.86	0.86	0.86	0.46	0.84	0.93	0.25	0.22	0.14	0.3	0.15	0.25	0.17	0.12	0.22	0.13	0.94	0.93	0.93	0.93	0.44	0.24	0.85	0.91	0.24	0.28	0.14	0.7	0.17	0.13	0.93	0.85
GSTT2B	0.86	0.91	0.14	0.13	0.13	0.13	0.14	0.92	0.92	0.91	0.76	0.92	0.93	0.44	0.44	0.14	0.6	0.1	0.13	0.1	0.12	0.11	0.12	0.94	0.94	0.93	0.93	0.17	0.26	0.92	0.92	0.17	0.14	0.2	0.17	0.18	0.11	0.92	0.91
GSTT2	0.84	0.91	0.13	0.15	0.14	0.17	0.16	0.91	0.92	0.91	0.76	0.92	0.93	0.43	0.34	0.15	0.55	0.11	0.13	0.11	0.12	0.11	0.13	0.94	0.93	0.94	0.93	0.29	0.28	0.92	0.91	0.19	0.13	0.18	0.15	0.2	0.12	0.92	0.91
GSTT1	0.88	0.93	0.9	0.69	0.85	0.22	0.91	0.9	0.9	0.89	0.72	0.89	0.93	0.31	0.22	0.13	0.13	0.18	0.13	0.16	0.13	0.18	0.15	0.95	0.94	0.94	0.94	0.84	0.87	0.86	0.92	0.14	0.72	0.16	0.54	0.16	0.12	0.93	0.92
GDAP1L1	0.1	0.16	0.17	0.16	0.17	0.17	0.16	0.23	0.19	0.16	0.15	0.2	0.19	0.16	0.16	0.11	0.18	0.14	0.15	0.15	0.14	0.19	0.47	0.19	0.14	0.13	0.14	0.17	0.14	0.17	0.17	0.57	0.29	0.14	0.13	0.11	0.19	0.16	0.26
GDAP1	0.12	0.24	0.15	0.17	0.24	0.2	0.15	0.13	0.12	0.14	0.15	0.16	0.14	0.18	0.15	0.24	0.31	0.27	0.37	0.61	0.21	0.25	0.19	0.16	0.12	0.12	0.26	0.23	0.15	0.14	0.2	0.42	0.16	0.17	0.19	0.19	0.17	0.22	0.19
CLIC6	0.11	0.42	0.19	0.26	0.23	0.25	0.27	0.15	0.14	0.13	0.16	0.17	0.21	0.36	0.16	0.11	0.12	0.22	0.14	0.12	0.19	0.19	0.11	0.12	0.21	0.12	0.12	0.81	0.27	0.16	0.56	0.31	0.22	0.15	0.17	0.17	0.42	0.12	0.14
CLIC5	0.1	0.37	0.22	0.24	0.22	0.2	0.21	0.15	0.16	0.12	0.14	0.14	0.56	0.18	0.16	0.15	0.17	0.18	0.18	0.21	0.12	0.2	0.14	0.12	0.1	0.1	0.14	0.86	0.35	0.13	0.47	0.3	0.15	0.12	0.09	0.2	0.24	0.12	0.16
CLIC4	0.19	0.61	0.37	0.29	0.24	0.27	0.25	0.15	0.14	0.12	0.13	0.15	0.53	0.26	0.23	0.16	0.17	0.15	0.19	0.19	0.12	0.18	0.13	0.1	0.14	0.15	0.22	0.84	0.22	0.39	0.53	0.59	0.14	0.14	0.1	0.17	0.31	0.29	0.19
CLIC3	0.15	0.17	0.18	0.21	0.38	0.24	0.2	0.14	0.15	0.13	0.13	0.15	0.3	0.21	0.16	0.17	0.2	0.24	0.17	0.16	0.21	0.27	0.15	0.53	0.11	0.1	0.12	0.76	0.27	0.72	0.23	0.16	0.46	0.12	0.15	0.1	0.38	0.21	0.1
CLIC2	0.17	0.48	0.22	0.22	0.2	0.2	0.21	0.17	0.18	0.14	0.15	0.15	0.14	0.18	0.15	0.18	0.22	0.19	0.17	0.18	0.14	0.25	0.17	0.17	0.6	0.58	0.17	0.75	0.42	0.16	0.75	0.19	0.34	0.22	0.12	0.55	0.26	0.15	0.44
CLIC1	0.16	0.27	0.28	0.29	0.23	0.28	0.4	0.13	0.15	0.11	0.14	0.12	0.28	0.45	0.3	0.27	0.2	0.16	0.26	0.16	0.1	0.24	0.14	0.1	0.15	0.15	0.13	0.77	0.62	0.14	0.68	0.43	0.23	0.12	0.17	0.18	0.27	0.2	0.2
GSTO2	0.76	0.69	0.77	0.55	0.76	0.74	0.76	0.89	0.89	0.88	0.88	0.88	0.87	0.93	0.92	0.29	0.16	0.18	0.23	0.15	0.17	0.14	0.16	0.31	0.37	0.35	0.24	0.15	0.18	0.79	0.71	0.13	0.17	0.23	0.16	0.59	0.15	0.21	0.4
GSTO1	0.54	0.16	0.17	0.19	0.79	0.18	0.61	0.88	0.89	0.88	0.89	0.88	0.89	0.93	0.93	0.39	0.19	0.22	0.26	0.19	0.32	0.17	0.16	0.43	0.42	0.43	0.31	0.15	0.18	0.41	0.2	0.13	0.15	0.2	0.18	0.27	0.13	0.4	0.47
GSTZ1	0.08	0.86	0.12	0.14	0.11	0.12	0.13	0.71	0.74	0.75	0.71	0.69	0.94	0.89	0.87	0.44	0.79	0.3	0.34	0.34	0.22	0.14	0.31	0.93	0.93	0.93	0.93	0.13	0.14	0.23	0.33	0.13	0.19	0.11	0.21	0.09	0.1	0.91	0.9
GSTA5	0.92	0.93	0.91	0.92	0.92	0.91	0.91	0.94	0.94	0.94	0.93	0.92	0.71	0.89	0.88	0.14	0.15	0.13	0.16	0.14	0.16	0.16	0.15	0.9	0.92	0.92	0.85	0.14	0.61	0.76	0.86	0.15	0.23	0.17	0.21	0.17	0.11	0.9	0.89
GSTA4	0.91	0.93	0.91	0.9	0.91	0.9	0.9	0.94	0.94	0.94	0.92	0.93	0.64	0.89	0.88	0.11	0.15	0.14	0.13	0.14	0.15	0.14	0.15	0.65	0.76	0.76	0.48	0.24	0.76	0.78	0.32	0.2	0.15	0.23	0.29	0.38	0.12	0.88	0.86
GSTA3	0.92	0.93	0.91	0.91	0.91	0.91	0.91	0.94	0.94	0.93	0.94	0.94	0.73	0.88	0.88	0.12	0.13	0.13	0.12	0.12	0.14	0.14	0.14	0.88	0.91	0.91	0.87	0.18	0.87	0.79	0.84	0.15	0.12	0.15	0.14	0.16	0.11	0.91	0.89
GSTA2	0.91	0.94	0.91	0.92	0.92	0.92	0.91	0.94	0.93	0.94	0.94	0.94	0.78	0.89	0.89	0.14	0.29	0.24	0.15	0.15	0.15	0.12	0.14	0.89	0.91	0.92	0.86	0.2	0.88	0.31	0.78	0.16	0.12	0.14	0.13	0.15	0.1	0.91	0.88
GSTA1	0.91	0.94	0.92	0.92	0.92	0.92	0.91	0.94	0.94	0.94	0.94	0.94	0.71	0.89	0.89	0.14	0.21	0.15	0.15	0.13	0.16	0.13	0.19	0.9	0.92	0.92	0.87	0.2	0.85	0.39	0.81	0.14	0.12	0.15	0.14	0.16	0.11	0.92	0.88
GSTM5	0.92	0.92	0.95	0.95	0.94	0.95	0.92	0.91	0.92	0.91	0.91	0.92	0.12	0.18	0.73	0.35	0.2	0.2	0.29	0.23	0.25	0.15	0.15	0.9	0.13	0.14	0.35	0.14	0.87	0.16	0.77	0.15	0.22	0.15	0.2	0.19	0.12	0.25	0.19
GSTM4	0.91	0.92	0.95	0.95	0.95	0.94	0.95	0.92	0.92	0.91	0.9	0.92	0.12	0.38	0.77	0.25	0.18	0.24	0.27	0.21	0.24	0.18	0.16	0.23	0.16	0.16	0.19	0.15	0.17	0.25	0.84	0.16	0.17	0.16	0.21	0.18	0.12	0.73	0.19
GSTM3	0.92	0.93	0.95	0.95	0.93	0.95	0.94	0.92	0.92	0.91	0.91	0.92	0.12	0.17	0.74	0.28	0.2	0.37	0.26	0.23	0.23	0.21	0.16	0.87	0.15	0.12	0.21	0.12	0.91	0.17	0.87	0.18	0.14	0.15	0.18	0.17	0.13	0.24	0.2
GSTM2	0.92	0.91	0.95	0.94	0.95	0.95	0.95	0.92	0.92	0.91	0.91	0.92	0.13	0.18	0.27	0.32	0.22	0.21	0.32	0.22	0.28	0.16	0.17	0.83	0.15	0.14	0.24	0.15	0.45	0.2	0.73	0.15	0.18	0.16	0.24	0.17	0.13	0.2	0.19
GSTM1	0.91	0.92	0.94	0.95	0.95	0.95	0.95	0.91	0.92	0.91	0.91	0.91	0.13	0.48	0.78	0.26	0.23	0.19	0.29	0.22	0.19	0.14	0.36	0.89	0.13	0.13	0.39	0.17	0.18	0.17	0.29	0.15	0.18	0.17	0.24	0.19	0.11	0.26	0.19
GSTP1	0.93	0.94	0.92	0.91	0.93	0.91	0.92	0.94	0.94	0.93	0.93	0.93	0.87	0.32	0.58	0.32	0.5	0.17	0.65	0.29	0.47	0.22	0.14	0.93	0.91	0.91	0.91	0.85	0.9	0.86	0.91	0.16	0.17	0.2	0.24	0.18	0.13	0.92	0.88
HPGDS	0.94	0.93	0.92	0.92	0.92	0.91	0.92	0.91	0.91	0.91	0.9	0.91	0.09	0.33	0.66	0.15	0.16	0.09	0.14	0.13	0.12	0.1	0.11	0.86	0.88	0.9	0.87	0.71	0.89	0.11	0.87	0.14	0.13	0.15	0.15	0.21	0.15	0.89	0.79
pTM
	HPGDS	GSTP1	GSTM1	GSTM2	GSTM3	GSTM4	GSTM5	GSTA1	GSTA2	GSTA3	GSTA4	GSTA5	GSTZ1	GSTO1	GSTO2	CLIC1	CLIC2	CLIC3	CLIC4	CLIC5	CLIC6	GDAP1	GDAP1L1	GSTT1	GSTT2	GSTT2B	GSTT4	AIMP2	EPRS1	EEF1E1	MARS1	PTGES2	FAXC	MTX1	MTX2	MTX3	GSTCD	EEF1G	VARS1
VARS1	0.86	0.91	0.58	0.57	0.56	0.57	0.56	0.9	0.9	0.91	0.87	0.9	0.89	0.75	0.83	0.58	0.79	0.53	0.58	0.55	0.52	0.62	0.58	0.91	0.92	0.91	0.89	0.57	0.48	0.82	0.9	0.55	0.57	0.56	0.6	0.61	0.6	0.92	0.88
EEF1G	0.92	0.94	0.61	0.61	0.57	0.75	0.59	0.94	0.93	0.93	0.92	0.93	0.93	0.64	0.66	0.58	0.54	0.55	0.6	0.57	0.5	0.6	0.55	0.94	0.94	0.94	0.93	0.57	0.87	0.88	0.9	0.76	0.59	0.57	0.55	0.56	0.61	0.94	0.92
GSTCD	0.59	0.58	0.55	0.57	0.56	0.56	0.55	0.54	0.54	0.54	0.56	0.54	0.56	0.55	0.55	0.61	0.6	0.63	0.58	0.59	0.63	0.54	0.55	0.55	0.54	0.53	0.56	0.64	0.63	0.63	0.84	0.55	0.53	0.56	0.53	0.55	0.51	0.66	0.58
MTX3	0.58	0.55	0.55	0.54	0.55	0.55	0.55	0.54	0.54	0.54	0.59	0.55	0.53	0.6	0.58	0.56	0.71	0.52	0.54	0.55	0.54	0.62	0.54	0.55	0.56	0.56	0.58	0.58	0.59	0.68	0.75	0.5	0.52	0.75	0.93	0.87	0.57	0.55	0.6
MTX2	0.57	0.59	0.58	0.57	0.56	0.56	0.56	0.54	0.54	0.55	0.58	0.62	0.6	0.56	0.55	0.53	0.52	0.52	0.51	0.52	0.55	0.61	0.53	0.73	0.56	0.56	0.76	0.56	0.63	0.6	0.9	0.54	0.92	0.92	0.57	0.93	0.56	0.55	0.57
MTX1	0.57	0.57	0.55	0.54	0.53	0.53	0.53	0.56	0.55	0.57	0.6	0.56	0.54	0.57	0.61	0.51	0.64	0.52	0.53	0.53	0.54	0.54	0.55	0.53	0.57	0.57	0.54	0.63	0.61	0.68	0.66	0.5	0.53	0.85	0.92	0.72	0.57	0.57	0.56
FAXC	0.56	0.56	0.55	0.57	0.54	0.54	0.58	0.54	0.54	0.55	0.67	0.58	0.56	0.57	0.55	0.53	0.63	0.82	0.55	0.54	0.57	0.57	0.79	0.64	0.55	0.54	0.56	0.59	0.59	0.58	0.56	0.53	0.95	0.54	0.92	0.52	0.55	0.58	0.57
PTGES2	0.59	0.54	0.51	0.51	0.53	0.54	0.53	0.58	0.56	0.58	0.59	0.53	0.58	0.52	0.51	0.67	0.56	0.53	0.69	0.57	0.53	0.65	0.55	0.67	0.54	0.56	0.58	0.59	0.78	0.88	0.78	0.84	0.53	0.53	0.55	0.5	0.55	0.77	0.55
MARS1	0.9	0.93	0.81	0.83	0.9	0.87	0.88	0.88	0.87	0.88	0.68	0.91	0.68	0.6	0.82	0.92	0.76	0.65	0.8	0.64	0.63	0.61	0.6	0.94	0.93	0.92	0.93	0.74	0.77	0.93	0.93	0.62	0.76	0.8	0.9	0.78	0.63	0.91	0.89
EEF1E1	0.56	0.87	0.62	0.62	0.61	0.6	0.58	0.74	0.6	0.86	0.77	0.74	0.6	0.64	0.83	0.61	0.61	0.88	0.6	0.61	0.56	0.64	0.61	0.89	0.92	0.92	0.89	0.87	0.9	0.9	0.93	0.85	0.59	0.74	0.6	0.62	0.63	0.89	0.82
EPRS1	0.92	0.93	0.61	0.77	0.93	0.66	0.91	0.9	0.9	0.89	0.84	0.89	0.59	0.63	0.62	0.84	0.68	0.64	0.89	0.89	0.62	0.89	0.6	0.93	0.69	0.69	0.62	0.93	0.91	0.9	0.79	0.8	0.59	0.6	0.59	0.58	0.65	0.57	0.78
AIMP2	0.66	0.91	0.57	0.56	0.56	0.56	0.53	0.56	0.59	0.58	0.57	0.56	0.54	0.59	0.57	0.86	0.79	0.84	0.88	0.85	0.77	0.69	0.58	0.91	0.66	0.61	0.84	0.89	0.93	0.88	0.69	0.64	0.63	0.61	0.57	0.56	0.61	0.56	0.65
GSTT4	0.91	0.92	0.57	0.57	0.57	0.58	0.59	0.9	0.9	0.9	0.7	0.89	0.93	0.59	0.58	0.52	0.6	0.52	0.58	0.53	0.51	0.56	0.52	0.95	0.94	0.94	0.94	0.7	0.64	0.89	0.93	0.57	0.58	0.52	0.82	0.54	0.53	0.93	0.89
GSTT2B	0.9	0.93	0.54	0.56	0.55	0.56	0.56	0.93	0.93	0.93	0.86	0.93	0.94	0.69	0.69	0.54	0.74	0.53	0.54	0.53	0.52	0.54	0.53	0.94	0.95	0.94	0.94	0.59	0.66	0.92	0.93	0.54	0.54	0.57	0.56	0.56	0.53	0.94	0.92
GSTT2	0.89	0.93	0.54	0.56	0.56	0.57	0.57	0.93	0.93	0.93	0.86	0.93	0.94	0.68	0.64	0.54	0.72	0.53	0.54	0.53	0.52	0.54	0.53	0.94	0.94	0.95	0.94	0.64	0.67	0.92	0.93	0.56	0.53	0.57	0.55	0.57	0.53	0.94	0.92
GSTT1	0.9	0.94	0.92	0.81	0.9	0.59	0.93	0.92	0.92	0.91	0.84	0.92	0.94	0.63	0.58	0.53	0.54	0.56	0.54	0.55	0.52	0.58	0.53	0.96	0.94	0.94	0.95	0.9	0.91	0.9	0.94	0.54	0.81	0.55	0.73	0.54	0.54	0.94	0.92
GDAP1L1	0.55	0.56	0.55	0.54	0.54	0.57	0.54	0.59	0.57	0.56	0.56	0.58	0.59	0.53	0.54	0.53	0.55	0.54	0.55	0.55	0.53	0.55	0.68	0.54	0.53	0.52	0.53	0.58	0.6	0.61	0.57	0.75	0.59	0.54	0.54	0.53	0.56	0.58	0.62
GDAP1	0.58	0.62	0.56	0.57	0.61	0.58	0.57	0.57	0.56	0.57	0.57	0.58	0.57	0.55	0.54	0.6	0.64	0.61	0.57	0.74	0.58	0.57	0.55	0.57	0.54	0.54	0.61	0.63	0.62	0.61	0.59	0.65	0.56	0.57	0.58	0.57	0.53	0.6	0.6
CLIC6	0.52	0.64	0.55	0.59	0.57	0.58	0.61	0.52	0.51	0.51	0.52	0.53	0.55	0.6	0.54	0.5	0.51	0.55	0.51	0.49	0.54	0.57	0.52	0.52	0.54	0.52	0.51	0.79	0.6	0.58	0.73	0.58	0.57	0.53	0.53	0.54	0.67	0.5	0.52
CLIC5	0.54	0.63	0.57	0.57	0.58	0.57	0.58	0.53	0.54	0.52	0.53	0.52	0.75	0.56	0.56	0.53	0.55	0.55	0.55	0.56	0.5	0.58	0.54	0.53	0.53	0.53	0.52	0.89	0.65	0.58	0.7	0.62	0.54	0.53	0.51	0.56	0.6	0.53	0.56
CLIC4	0.57	0.75	0.66	0.61	0.59	0.62	0.6	0.54	0.55	0.54	0.54	0.54	0.73	0.6	0.58	0.54	0.55	0.53	0.56	0.56	0.51	0.58	0.54	0.52	0.55	0.55	0.57	0.88	0.62	0.7	0.75	0.75	0.54	0.54	0.52	0.54	0.63	0.61	0.58
CLIC3	0.56	0.54	0.55	0.56	0.64	0.57	0.55	0.53	0.53	0.52	0.52	0.53	0.6	0.57	0.56	0.54	0.55	0.59	0.53	0.54	0.54	0.61	0.55	0.73	0.54	0.53	0.51	0.83	0.65	0.83	0.58	0.53	0.69	0.51	0.54	0.51	0.66	0.56	0.52
CLIC2	0.58	0.69	0.57	0.56	0.56	0.57	0.57	0.55	0.56	0.54	0.55	0.54	0.55	0.56	0.55	0.55	0.57	0.56	0.55	0.55	0.51	0.6	0.55	0.55	0.74	0.73	0.54	0.83	0.72	0.6	0.85	0.56	0.64	0.57	0.52	0.73	0.61	0.55	0.7
CLIC1	0.57	0.61	0.6	0.63	0.59	0.62	0.67	0.53	0.53	0.52	0.53	0.53	0.6	0.67	0.61	0.6	0.56	0.54	0.59	0.55	0.49	0.6	0.54	0.52	0.55	0.55	0.52	0.84	0.8	0.6	0.81	0.67	0.58	0.52	0.55	0.54	0.62	0.57	0.58
GSTO2	0.85	0.81	0.87	0.76	0.85	0.85	0.86	0.91	0.92	0.91	0.91	0.91	0.9	0.94	0.93	0.61	0.54	0.56	0.58	0.55	0.54	0.55	0.54	0.62	0.65	0.64	0.59	0.58	0.63	0.86	0.84	0.51	0.56	0.57	0.56	0.75	0.53	0.59	0.69
GSTO1	0.75	0.58	0.57	0.58	0.86	0.58	0.78	0.91	0.91	0.91	0.91	0.91	0.91	0.93	0.94	0.64	0.57	0.58	0.59	0.56	0.59	0.55	0.53	0.68	0.68	0.68	0.62	0.58	0.63	0.7	0.6	0.51	0.55	0.57	0.56	0.61	0.53	0.68	0.72
GSTZ1	0.53	0.9	0.54	0.54	0.53	0.53	0.53	0.82	0.84	0.84	0.82	0.81	0.94	0.91	0.91	0.69	0.86	0.6	0.64	0.64	0.57	0.57	0.63	0.94	0.94	0.94	0.94	0.52	0.59	0.61	0.63	0.58	0.57	0.54	0.59	0.53	0.56	0.92	0.91
GSTA5	0.93	0.94	0.93	0.94	0.93	0.93	0.93	0.95	0.95	0.95	0.94	0.93	0.82	0.91	0.91	0.53	0.54	0.52	0.54	0.53	0.52	0.57	0.55	0.91	0.93	0.93	0.9	0.55	0.78	0.83	0.9	0.52	0.59	0.56	0.58	0.55	0.55	0.93	0.9
GSTA4	0.92	0.94	0.92	0.93	0.92	0.92	0.92	0.94	0.95	0.94	0.94	0.94	0.78	0.91	0.91	0.52	0.55	0.52	0.54	0.53	0.52	0.57	0.55	0.79	0.85	0.86	0.71	0.6	0.86	0.85	0.63	0.59	0.55	0.59	0.61	0.64	0.55	0.92	0.88
GSTA3	0.93	0.94	0.93	0.93	0.93	0.92	0.92	0.95	0.95	0.94	0.94	0.95	0.83	0.91	0.91	0.53	0.54	0.52	0.53	0.52	0.52	0.57	0.55	0.91	0.92	0.92	0.9	0.56	0.89	0.84	0.89	0.58	0.54	0.55	0.55	0.55	0.55	0.93	0.91
GSTA2	0.93	0.94	0.93	0.94	0.93	0.93	0.93	0.95	0.94	0.95	0.94	0.95	0.86	0.92	0.91	0.53	0.61	0.57	0.54	0.53	0.52	0.56	0.55	0.91	0.93	0.93	0.9	0.58	0.9	0.66	0.85	0.58	0.54	0.55	0.54	0.54	0.55	0.93	0.9
GSTA1	0.92	0.94	0.93	0.94	0.93	0.93	0.93	0.94	0.95	0.95	0.94	0.95	0.82	0.91	0.91	0.53	0.57	0.53	0.54	0.52	0.52	0.57	0.57	0.92	0.93	0.93	0.9	0.57	0.89	0.69	0.87	0.57	0.54	0.55	0.55	0.54	0.55	0.94	0.89
GSTM5	0.93	0.93	0.95	0.95	0.95	0.95	0.93	0.93	0.93	0.92	0.92	0.93	0.53	0.58	0.85	0.65	0.57	0.55	0.62	0.58	0.58	0.58	0.55	0.93	0.56	0.56	0.64	0.54	0.91	0.58	0.85	0.53	0.59	0.54	0.56	0.55	0.56	0.56	0.57
GSTM4	0.93	0.94	0.96	0.96	0.95	0.95	0.95	0.93	0.93	0.92	0.92	0.93	0.53	0.67	0.86	0.6	0.55	0.57	0.61	0.57	0.58	0.58	0.56	0.6	0.57	0.57	0.56	0.57	0.61	0.63	0.88	0.54	0.55	0.54	0.57	0.55	0.56	0.73	0.57
GSTM3	0.93	0.94	0.95	0.95	0.94	0.95	0.95	0.93	0.93	0.93	0.93	0.93	0.54	0.57	0.85	0.59	0.56	0.63	0.6	0.57	0.56	0.58	0.55	0.91	0.56	0.55	0.56	0.55	0.92	0.6	0.9	0.54	0.54	0.53	0.56	0.54	0.56	0.56	0.58
GSTM2	0.93	0.93	0.96	0.95	0.95	0.96	0.95	0.94	0.94	0.93	0.93	0.94	0.54	0.58	0.62	0.64	0.56	0.55	0.64	0.59	0.6	0.58	0.56	0.89	0.57	0.57	0.59	0.56	0.73	0.62	0.83	0.52	0.56	0.54	0.58	0.54	0.56	0.57	0.57
GSTM1	0.93	0.94	0.95	0.96	0.95	0.96	0.95	0.93	0.93	0.93	0.92	0.93	0.54	0.72	0.87	0.61	0.57	0.55	0.62	0.57	0.54	0.56	0.6	0.92	0.54	0.54	0.66	0.57	0.61	0.6	0.61	0.54	0.56	0.54	0.58	0.55	0.56	0.58	0.57
GSTP1	0.94	0.95	0.94	0.93	0.94	0.93	0.94	0.94	0.94	0.94	0.94	0.94	0.9	0.65	0.76	0.63	0.7	0.55	0.78	0.61	0.65	0.6	0.56	0.94	0.93	0.93	0.92	0.9	0.93	0.89	0.93	0.56	0.56	0.57	0.59	0.55	0.57	0.94	0.9
HPGDS	0.95	0.94	0.93	0.93	0.93	0.93	0.93	0.92	0.93	0.93	0.92	0.93	0.53	0.66	0.81	0.57	0.57	0.54	0.55	0.55	0.52	0.57	0.56	0.9	0.92	0.92	0.91	0.83	0.92	0.55	0.9	0.57	0.57	0.58	0.57	0.58	0.59	0.93	0.86
