# Supplementary figures and images for: Hidden Glutathione Transferases in the Human Genome
Source: MDPI journal article supplement (doi:10.3390/biom13081240), 2023-08-12

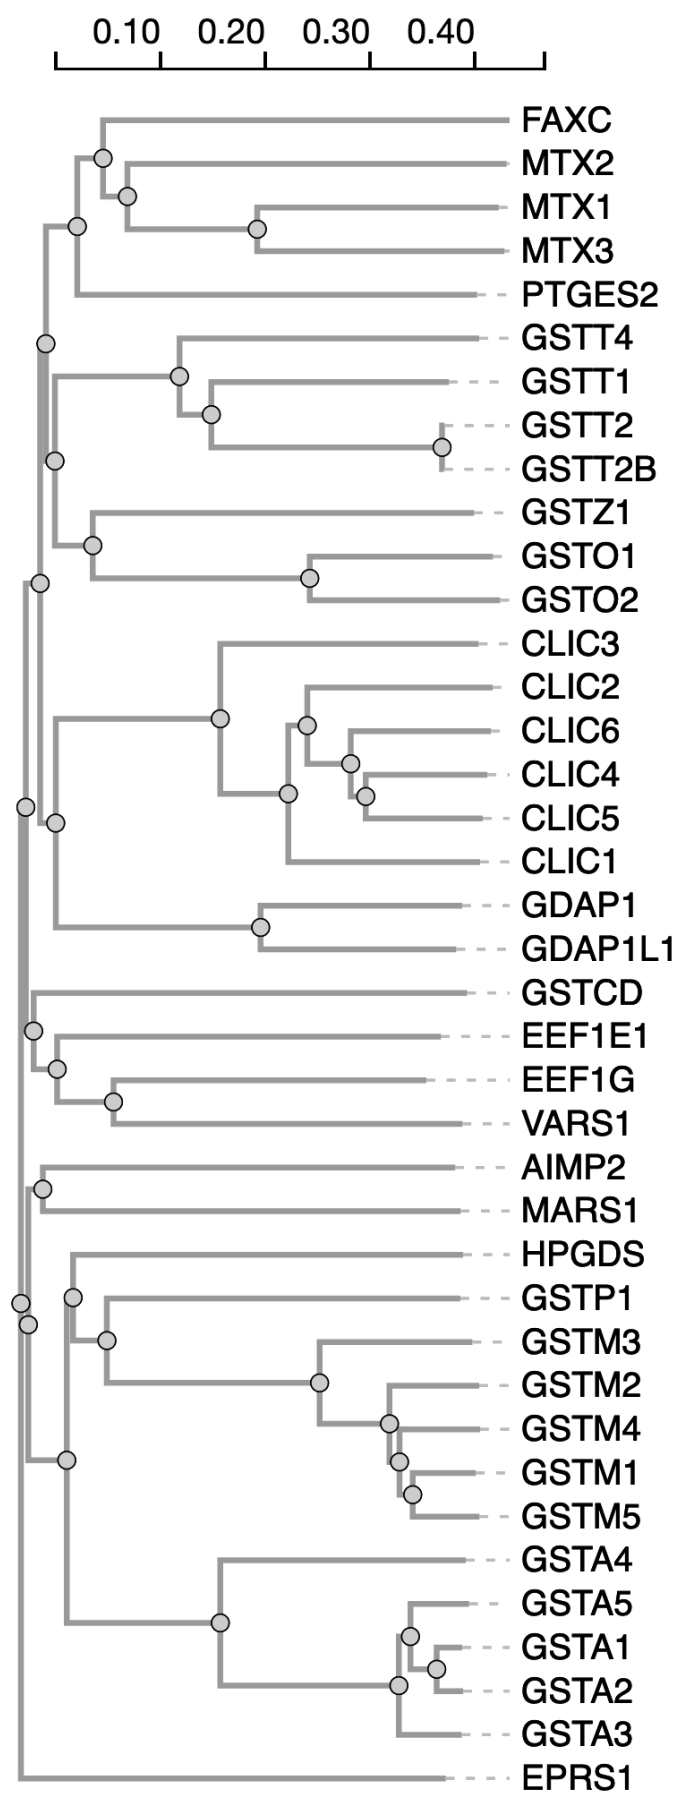

**Figure S2.** Phylogram of 39 GST-domain sequences.

Supplement: s1 [file s1]
